# Supplementary material for: Influenza Transmission in the Mother-Infant Dyad Leads to Severe Disease, Mammary Gland Infection, and Pathogenesis by Regulating Host Responses
Source: PubMed Central journal article supplement (PMC4598190; doi:10.1371/journal.ppat.1005173), 2015-10-08
Supplement: ppat.1005173.s001.pdf [file ppat.1005173.s001.pdf]

## S1 Table. Mean Weight and Temperature Readings of Mothers of Mock Infected Infants

|             | Baseline | 1        | 2        | 3        | 4        | 5        | 6        | 7        | 8        | 9        | 10       | 11       | 12       | 13       | 14       |
|-------------|----------|----------|----------|----------|----------|----------|----------|----------|----------|----------|----------|----------|----------|----------|----------|
| Temperature | 100      | 99.78671 | 100.4604 | 101.0602 | 100.9083 | 99.78129 | 100.3032 | 100.7288 | 99.6966  | 100.6433 | 101.3316 | 100.9896 | 99.01317 | 99.79082 | 100.4752 |
| Weight      | 100      | 101.4476 | 100.5101 | 100.2057 | 98.70447 | 98.6431  | 99.88197 | 101.1513 | 102.0838 | 101.7276 | 101.4811 | 101.6606 | 98.86033 | 98.86033 | 99.87296 |
