# Supplementary material for: Influenza Transmission in the Mother-Infant Dyad Leads to Severe Disease, Mammary Gland Infection, and Pathogenesis by Regulating Host Responses
Source: PubMed Central journal article supplement (PMC4598190; doi:10.1371/journal.ppat.1005173), 2015-10-08
Supplement: ppat.1005173.s002.pdf [file ppat.1005173.s002.pdf]

## S2 Table. Gene Enrichment Scores

### Upregulated Genes

Day 3/4; ↑

| Gene Classification Group                                | Score (-log <sub>10</sub> ) |
|----------------------------------------------------------|-----------------------------|
| <b>Splicesome</b><br>KEGG (cfa03040)                     | 4.28                        |
| <b>Ubiquitin Mediated Proteolysis</b><br>KEGG (cfa04120) | 2.12                        |
| <b>RNA Degradation</b><br>KEGG (cfa03018)                | 1.96                        |
| <b>Neutrophin Signaling Pathway</b><br>KEGG (cfa04722)   | 1.67                        |
| <b>Pathways in Cancer</b><br>KEGG (cfa05200)             | 1.57                        |
| <b>Adherens Junction</b><br>KEGG (cfa04520)              | 1.35                        |

Day 6/7; ↑

| Gene Classification Group                                      | Score (-log <sub>10</sub> ) |
|----------------------------------------------------------------|-----------------------------|
| <b>Splicesome</b><br>KEGG (cfa03040)                           | 9.09                        |
| <b>Ubiquitin Mediated Proteolysis</b><br>KEGG (cfa04120)       | 8.39                        |
| <b>Proteasome</b><br>KEGG (cfa03050)                           | 7.77                        |
| <b>Lysosome</b><br>KEGG (cfa04142)                             | 6.12                        |
| <b>RNA Degradation</b><br>KEGG (cfa03018)                      | 4.47                        |
| <b>TGF-Beta Signaling Pathway</b><br>KEGG (cfa04350)           | 3.34                        |
| <b>Cell Cycle</b><br>KEGG (cfa04110)                           | 2.98                        |
| <b>Colorectal Cancer</b><br>KEGG (cfa05210)                    | 2.58                        |
| <b>p53 Signaling Pathway</b><br>KEGG (cfa04115)                | 2.51                        |
| <b>Pancreatic Cancer</b><br>KEGG (cfa05212)                    | 2.39                        |
| <b>Wnt Signaling Pathway</b><br>KEGG (cfa04310)                | 2.34                        |
| <b>Adherens Junction</b><br>KEGG (cfa04520)                    | 2.30                        |
| <b>Aminoacyl-tRNA Biosynthesis</b><br>KEGG (cfa00970)          | 2.22                        |
| <b>Nucleotide Excision Repair</b><br>KEGG (cfa03420)           | 2.22                        |
| <b>Oocyte Meiosis</b><br>KEGG (cfa04114)                       | 2.10                        |
| <b>Pathways in Cancer</b><br>KEGG (cfa05200)                   | 2.02                        |
| <b>Focal Adhesion</b><br>KEGG (cfa04510)                       | 1.76                        |
| <b>Toll-Like Receptor Signaling Pathway</b><br>KEGG (cfa04620) | 1.76                        |
| <b>Basal Transcription Factors</b><br>KEGG (cfa03022)          | 1.49                        |
| <b>Pyrimidine Metabolism</b><br>KEGG (cfa00240)                | 1.34                        |

### Downregulated Genes

Day 3/4; ↓

| Gene Classification Group                                                      | Score (-log <sub>10</sub> ) |
|--------------------------------------------------------------------------------|-----------------------------|
| <b>Phenylalanine, Tyrosine, and Tryptophan Biosynthesis</b><br>KEGG (cfa00400) | 3.13                        |
| <b>Phenylalanine Metabolism</b><br>KEGG (cfa00360)                             | 2.80                        |
| <b>Tyrosine Metabolism</b><br>KEGG (cfa00350)                                  | 1.90                        |
| <b>PPAR Signaling Pathway</b><br>KEGG (cfa03320)                               | 1.88                        |

Day 6/7; ↓

| Gene Classification Group                                        | Score (-log <sub>10</sub> ) |
|------------------------------------------------------------------|-----------------------------|
| <b>Glycerolipid Metabolism</b><br>KEGG (cfa00561)                | 1.62                        |
| <b>Arachidonic Acid Metabolism</b><br>KEGG (cfa00590)            | 1.61                        |
| <b>Jak-STAT Signaling Pathway</b><br>KEGG (cfa04630)             | 1.51                        |
| <b>Complement and Coagulation Cascades</b><br>KEGG (cfa04610)    | 1.44                        |
| <b>Cytokine-Cytokine Receptor Interaction</b><br>KEGG (cfa04060) | 1.39                        |
| <b>Arginine and Proline Metabolism</b><br>KEGG (cfa00330)        | 1.31                        |
