# Supplementary material for: Influenza Transmission in the Mother-Infant Dyad Leads to Severe Disease, Mammary Gland Infection, and Pathogenesis by Regulating Host Responses
Source: PubMed Central journal article supplement (PMC4598190; doi:10.1371/journal.ppat.1005173), 2015-10-08
Supplement: ppat.1005173.s003.pdf [file ppat.1005173.s003.pdf]

**S3 Table. qRT-PCR Primer Sequences**

| <b>Ferret Gene Targets</b>                   |                                             |
|----------------------------------------------|---------------------------------------------|
| <b>Gene</b>                                  | <b>Primer Sequence (5' - 3')</b>            |
| <b>β-ACTIN</b>                               | Forward: TGACCGGATGCAGAAGGA                 |
|                                              | Reverse: CCGATCCACACCGAGTACTT               |
| <b>STAT5a</b>                                | Forward: CCCAAGGACGAGGTCTTCTC               |
|                                              | Reverse: CACTGCTTTAGCGAGCACAG               |
| <b>STAT5b</b>                                | Forward: AGCTCCAGAACACGTACGAC               |
|                                              | Reverse: GTCAGCAAGACTTCCAACCG               |
| <b>LPL</b>                                   | Forward: AGTTCATCAACTGGATGGCG               |
|                                              | Reverse:<br>GACCTTCTTATTGGTCAGGCTT          |
| <b>CSN2</b>                                  | Forward: CCACTGAGACTGTGGAAAGC               |
|                                              | Reverse: TTCTGCTTGTGATGTGCGT                |
| <b>FOS</b>                                   | Forward:<br>GGGAAAGGAATAAGATGGCCG           |
|                                              | Reverse: TCTGTTTCCGCTTGGAGTGT               |
| <b>MSR1</b>                                  | Forward: GCCTTGCTCCCTCTGTATCC               |
|                                              | Reverse: GTGCAGCTTTGAGGGACTTC               |
| <b>CXCL10</b>                                | Forward:<br>CTTTGAACCAAAGTGCTGTTCTTATC      |
|                                              | Reverse:<br>AGCGTGTAGTTCTAGAGAGAGGTACT<br>C |
| <b>CCL2</b>                                  | Forward: GCCCAGCCAGATGCAATTA                |
|                                              | Reverse: TTCTTTGGGACACTTGCTGC               |
| <b>CCL19</b>                                 | Forward: TTCCGAGCTGGAACACTTCT               |
|                                              | Reverse:<br>GAACACAACAGCAGGCACTC            |
|                                              |                                             |
| <b>Influenza Gene Targets</b>                |                                             |
| <b>Gene</b>                                  | <b>Primer Sequence (5' - 3')</b>            |
| <b>A/California/07/2009 (H1N1) Segment 7</b> | Forward:<br>AAGACAAGACCAATCTTGTCACTCT       |
|                                              | Reverse: TCTACGCTGCAGTCTCGCT                |
