# Supplementary material for: Influenza Transmission in the Mother-Infant Dyad Leads to Severe Disease, Mammary Gland Infection, and Pathogenesis by Regulating Host Responses
Source: PubMed Central journal article supplement (PMC4598190; doi:10.1371/journal.ppat.1005173), 2015-10-08
Supplement: ppat.1005173.s004.pdf [file ppat.1005173.s004.pdf]

## S4 Table. Functional Annotation Analysis for Bystander Mammary Glands

### Upregulated Genes

### Downregulated Genes

Day 3/4; ↑

| Gene Classification Group                                     | Score (-log <sub>10</sub> ) |
|---------------------------------------------------------------|-----------------------------|
| <b>Complement and Coagulation Cascades</b><br>KEGG (cfa04610) | 2.03                        |
| <b>Small Cell Lung Cancer</b><br>KEGG (cfa05222)              | 1.75                        |
| <b>Prostate Cancer</b><br>KEGG (cfa05215)                     | 1.65                        |
| <b>Focal Adhesion</b><br>KEGG (cfa04510)                      | 1.42                        |
| <b>Arachidonic Acid Metabolism</b><br>KEGG (cfa00590)         | 1.38                        |
| <b>Chemokine Signaling Pathway</b><br>KEGG (cfa04062)         | 1.38                        |
| <b>Neutrophin Signaling Pathway</b><br>KEGG (cfa04722)        | 1.38                        |

Day 6/7; ↑

| Gene Classification Group                                      | Score (-log <sub>10</sub> ) |
|----------------------------------------------------------------|-----------------------------|
| <b>Proteasome</b><br>KEGG (cfa03050)                           | 1.90                        |
| <b>Ether Lipid Metabolism</b><br>KEGG (cfa00565)               | 1.89                        |
| <b>Complement and Coagulation Cascades</b><br>KEGG (cfa04610)  | 1.79                        |
| <b>Leukocyte Transendothelial Migration</b><br>KEGG (cfa04670) | 1.47                        |
| <b>ECM-Receptor Interaction</b><br>KEGG (cfa04512)             | 1.40                        |

Day 3/4; ↓

| Gene Classification Group                                              | Score (-log <sub>10</sub> ) |
|------------------------------------------------------------------------|-----------------------------|
| <b>Hypertrophic Cardiomyopathy (HCM)</b><br>KEGG (cfa05410)            | 2.03                        |
| <b>Dilated Cardiomyopathy</b><br>KEGG (cfa05414)                       | 1.84                        |
| <b>Calcium Signaling Pathway</b><br>KEGG (cfa04020)                    | 1.69                        |
| <b>Valine, Leucine, and Isoleucine Biosynthesis</b><br>KEGG (cfa00290) | 1.68                        |
| <b>RNA Polymerase</b><br>KEGG (cfa03020)                               | 1.35                        |

Day 6/7; ↓

| Gene Classification Group                                             | Score (-log <sub>10</sub> ) |
|-----------------------------------------------------------------------|-----------------------------|
| <b>Glycerolipid Metabolism</b><br>KEGG (cfa00561)                     | 2.66                        |
| <b>Propanoate Metabolism</b><br>KEGG (cfa00640)                       | 2.60                        |
| <b>Hedgehog Signaling Pathway</b><br>KEGG (cfa04340)                  | 1.76                        |
| <b>PPAR Signaling Pathway</b><br>KEGG (cfa03320)                      | 1.76                        |
| <b>Adipocytokine Signaling Pathway</b><br>KEGG (cfa04920)             | 1.72                        |
| <b>Glycosphingolipid Biosynthesis</b><br>KEGG (cfa00604)              | 1.67                        |
| <b>Fructose and Mannose Metabolism</b><br>KEGG (cfa00051)             | 1.63                        |
| <b>N-Glycan Biosynthesis</b><br>KEGG (cfa00510)                       | 1.62                        |
| <b>Valine, Leucine, and Isoleucine Degradation</b><br>KEGG (cfa00280) | 1.62                        |
| <b>Acute Myeloid Leukemia</b><br>KEGG (cfa05221)                      | 1.40                        |
| <b>Pentose Phosphate Pathway</b><br>KEGG (cfa00030)                   | 1.39                        |
| <b>Tight Junction</b><br>KEGG (cfa04530)                              | 1.36                        |
