# Supplementary material for: Influenza Transmission in the Mother-Infant Dyad Leads to Severe Disease, Mammary Gland Infection, and Pathogenesis by Regulating Host Responses
Source: PubMed Central journal article supplement (PMC4598190; doi:10.1371/journal.ppat.1005173), 2015-10-08
Supplement: ppat.1005173.s005.pdf [file ppat.1005173.s005.pdf]

## S5 Table. Functional Annotation Analysis for Bystander / H1N1+ Mammary Gland Comparison

### i. KEGG Pathway Annotations

#### Upregulated Genes; Day 3/4

##### H1N1+

| Gene Classification Group                      | Score<br>(-log <sub>10</sub> ) | Gene<br>Count | Fold Enrichment |
|------------------------------------------------|--------------------------------|---------------|-----------------|
| cfa04520:Adherens junction                     | 1.92                           | 10            | 2.64            |
| cfa03018:RNA degradation                       | 1.52                           | 8             | 2.62            |
| cfa05322:Systemic lupus erythematosus          | 1.35                           | 10            | 2.11            |
| cfa04010:MAPK signaling pathway                | 1.19                           | 21            | 1.50            |
| cfa03040:Spliceosome                           | 1.17                           | 13            | 1.74            |
| cfa04120:Ubiquitin mediated proteolysis        | 1.15                           | 12            | 1.78            |
| cfa00480:Glutathione metabolism                | 1.14                           | 6             | 2.65            |
| cfa04530:Tight junction                        | 1.13                           | 12            | 1.77            |
| cfa04622:RIG-I-like receptor signaling pathway | 1.12                           | 7             | 2.33            |
| cfa04722:Neurotrophin signaling pathway        | 0.98                           | 11            | 1.71            |

##### Bystander

| Gene Classification Group                    | Score<br>(-log <sub>10</sub> ) | Gene<br>Count | Fold Enrichment |
|----------------------------------------------|--------------------------------|---------------|-----------------|
| cfa04510:Focal adhesion                      | 2.60                           | 19            | 2.17            |
| cfa04664:Fc epsilon RI signaling pathway     | 1.78                           | 9             | 2.71            |
| cfa00590:Arachidonic acid metabolism         | 1.20                           | 6             | 2.77            |
| cfa04910:Insulin signaling pathway           | 1.20                           | 11            | 1.89            |
| cfa04010:MAPK signaling pathway              | 1.20                           | 19            | 1.54            |
| cfa04610:Complement and coagulation cascades | 1.20                           | 7             | 2.45            |
| cfa05222:Small cell lung cancer              | 1.19                           | 8             | 2.23            |
| cfa04810:Regulation of actin cytoskeleton    | 1.12                           | 15            | 1.62            |
| cfa04062:Chemokine signaling pathway         | 1.08                           | 13            | 1.68            |
| cfa05221:Acute myeloid leukemia              | 0.97                           | 6             | 2.37            |

##### Both

| Gene Classification Group                     | Score<br>(-log <sub>10</sub> ) | Gene<br>Count | Fold Enrichment |
|-----------------------------------------------|--------------------------------|---------------|-----------------|
| cfa03040:Spliceosome                          | 3.95                           | 13            | 3.84            |
| cfa04612:Antigen processing and presentation  | 2.09                           | 7             | 3.91            |
| cfa05200:Pathways in cancer                   | 1.42                           | 14            | 1.83            |
| cfa04310:Wnt signaling pathway                | 1.37                           | 8             | 2.45            |
| cfa02010:ABC transporters                     | 1.14                           | 4             | 4.09            |
| cfa04120:Ubiquitin mediated proteolysis       | 1.09                           | 7             | 2.29            |
| cfa04620:Toll-like receptor signaling pathway | 0.84                           | 5             | 2.44            |
| cfa04722:Neurotrophin signaling pathway       | 0.79                           | 6             | 2.06            |
| cfa05215:Prostate cancer                      | 0.78                           | 5             | 2.30            |
| cfa04610:Complement and coagulation cascades  | 0.74                           | 4             | 2.70            |

## Upregulated Genes; Day 6/7

### H1N1+

| Gene Classification Group               | Score<br>(-log <sub>10</sub> ) | Gene<br>Count | Fold<br>Enrichment |
|-----------------------------------------|--------------------------------|---------------|--------------------|
| cfa03040:Spliceosome                    | 8.91                           | 52            | 2.35               |
| cfa04120:Ubiquitin mediated proteolysis | 7.59                           | 46            | 2.31               |
| cfa04142:Lysosome                       | 4.58                           | 35            | 2.06               |
| cfa03050:Proteasome                     | 4.06                           | 19            | 2.65               |
| cfa03018:RNA degradation                | 4.06                           | 22            | 2.44               |
| cfa04110:Cell cycle                     | 3.57                           | 35            | 1.86               |
| cfa04350:TGF-beta signaling pathway     | 3.21                           | 25            | 2.03               |
| cfa04310:Wnt signaling pathway          | 2.54                           | 35            | 1.64               |
| cfa00970:Aminoacyl-tRNA biosynthesis    | 2.49                           | 15            | 2.29               |
| cfa04520:Adherens junction              | 2.26                           | 21            | 1.87               |

### Bystander

| Gene Classification Group                           | Score<br>(-log <sub>10</sub> ) | Gene<br>Count | Fold<br>Enrichment |
|-----------------------------------------------------|--------------------------------|---------------|--------------------|
| cfa04740:Olfactory transduction                     | 3.81                           | 27            | 2.19               |
| cfa03010:Ribosome                                   | 1.92                           | 9             | 2.87               |
| cfa00591:Linoleic acid metabolism                   | 0.90                           | 3             | 4.83               |
| cfa03320:PPAR signaling pathway                     | 0.86                           | 5             | 2.49               |
| cfa04080:Neuroactive ligand-receptor interaction    | 0.85                           | 11            | 1.60               |
| cfa00072:Synthesis and degradation of ketone bodies | 0.72                           | 2             | 9.67               |
| cfa00512:O-Glycan biosynthesis                      | 0.70                           | 3             | 3.62               |
| cfa04270:Vascular smooth muscle contraction         | 0.65                           | 6             | 1.83               |
| cfa04960:Aldosterone-regulated sodium reabsorption  | 0.48                           | 3             | 2.54               |
| cfa00270:Cysteine and methionine metabolism         | 0.48                           | 3             | 2.54               |

### Both

| Gene Classification Group                            | Score<br>(-log <sub>10</sub> ) | Gene<br>Count | Fold<br>Enrichment |
|------------------------------------------------------|--------------------------------|---------------|--------------------|
| cfa03050:Proteasome                                  | 2.44                           | 10            | 3.14               |
| cfa04610:Complement and coagulation cascades         | 2.03                           | 11            | 2.56               |
| cfa04612:Antigen processing and presentation         | 1.88                           | 12            | 2.31               |
| cfa00565:Ether lipid metabolism                      | 1.63                           | 7             | 3.06               |
| cfa04620:Toll-like receptor signaling pathway        | 1.48                           | 12            | 2.01               |
| cfa04512:ECM-receptor interaction                    | 1.39                           | 11            | 2.03               |
| cfa05222:Small cell lung cancer                      | 1.39                           | 11            | 2.03               |
| cfa04670:Leukocyte transendothelial migration        | 1.26                           | 14            | 1.74               |
| cfa04510:Focal adhesion                              | 1.19                           | 20            | 1.52               |
| cfa00520:Amino sugar and nucleotide sugar metabolism | 1.18                           | 7             | 2.40               |

## Downregulated Genes; Day 3/4

### H1N1+

| Gene Classification Group                                    | Score<br>(-log <sub>10</sub> ) | Gene<br>Count | Fold Enrichment |
|--------------------------------------------------------------|--------------------------------|---------------|-----------------|
| cfa00400:Phenylalanine, tyrosine and tryptophan biosynthesis | 2.20                           | 4             | 9.21            |
| cfa00360:Phenylalanine metabolism                            | 1.62                           | 5             | 4.32            |
| cfa04340:Hedgehog signaling pathway                          | 1.60                           | 9             | 2.49            |
| cfa00590:Arachidonic acid metabolism                         | 1.31                           | 8             | 2.35            |
| cfa03320:PPAR signaling pathway                              | 1.27                           | 10            | 2.03            |
| cfa00270:Cysteine and methionine metabolism                  | 1.19                           | 7             | 2.42            |
| cfa00130:Ubiquinone and other terpenoid-quinone biosynthesis | 1.07                           | 3             | 5.92            |
| cfa04080:Neuroactive ligand-receptor interaction             | 0.96                           | 23            | 1.37            |
| cfa00430:Taurine and hypotaurine metabolism                  | 0.87                           | 3             | 4.61            |
| cfa00620:Pyruvate metabolism                                 | 0.83                           | 6             | 2.13            |

### Bystander

| Gene Classification Group                             | Score<br>(-log <sub>10</sub> ) | Gene<br>Count | Fold Enrichment |
|-------------------------------------------------------|--------------------------------|---------------|-----------------|
| cfa05410:Hypertrophic cardiomyopathy (HCM)            | 1.53                           | 5             | 4.20            |
| cfa05414:Dilated cardiomyopathy                       | 1.45                           | 5             | 3.95            |
| cfa00563:GPI-anchor biosynthesis                      | 1.38                           | 3             | 9.04            |
| cfa00350:Tyrosine metabolism                          | 1.14                           | 3             | 6.63            |
| cfa00980:Metabolism of xenobiotics by cytochrome P450 | 1.00                           | 3             | 5.52            |
| cfa04020:Calcium signaling pathway                    | 0.95                           | 6             | 2.31            |
| cfa00982:Drug metabolism                              | 0.91                           | 3             | 4.85            |
| cfa00360:Phenylalanine metabolism                     | 0.67                           | 2             | 8.29            |
| cfa05214:Glioma                                       | 0.62                           | 3             | 3.16            |
| cfa04260:Cardiac muscle contraction                   | 0.61                           | 3             | 3.11            |

### Both

| Gene Classification Group                            | Score<br>(-log <sub>10</sub> ) | Gene<br>Count | Fold Enrichment |
|------------------------------------------------------|--------------------------------|---------------|-----------------|
| cfa00290:Valine, leucine and isoleucine biosynthesis | 2.00                           | 4             | 8.38            |
| cfa05213:Endometrial cancer                          | 1.49                           | 7             | 2.88            |
| cfa00970:Aminoacyl-tRNA biosynthesis                 | 1.33                           | 6             | 2.99            |
| cfa04012:ErbB signaling pathway                      | 0.99                           | 8             | 2.00            |
| cfa00030:Pentose phosphate pathway                   | 0.99                           | 4             | 3.49            |
| cfa05223:Non-small cell lung cancer                  | 0.98                           | 6             | 2.37            |
| cfa04020:Calcium signaling pathway                   | 0.94                           | 13            | 1.58            |
| cfa04510:Focal adhesion                              | 0.93                           | 14            | 1.54            |
| cfa05212:Pancreatic cancer                           | 0.92                           | 7             | 2.07            |
| cfa05410:Hypertrophic cardiomyopathy (HCM)           | 0.77                           | 7             | 1.86            |

## Downregulated Genes; Day 6/7

### H1N1+

| Gene Classification Group                        | Score (-log <sub>10</sub> ) | Gene Count | Fold Enrichment |
|--------------------------------------------------|-----------------------------|------------|-----------------|
| cfa04060:Cytokine-cytokine receptor interaction  | <b>1.87</b>                 | 20         | 1.81            |
| cfa00590:Arachidonic acid metabolism             | 1.22                        | 7          | 2.48            |
| cfa04740:Olfactory transduction                  | 1.08                        | 33         | 1.32            |
| cfa04630:Jak-STAT signaling pathway              | 0.89                        | 13         | 1.56            |
| cfa05414:Dilated cardiomyopathy                  | 0.89                        | 9          | 1.78            |
| cfa03020:RNA polymerase                          | 0.85                        | 4          | 3.02            |
| cfa00230:Purine metabolism                       | 0.82                        | 13         | 1.50            |
| cfa04610:Complement and coagulation cascades     | 0.78                        | 7          | 1.88            |
| cfa00650:Butanoate metabolism                    | 0.63                        | 4          | 2.38            |
| cfa04914:Progesterone-mediated oocyte maturation | 0.53                        | 8          | 1.48            |

### Bystander

| Gene Classification Group                            | Score (-log <sub>10</sub> ) | Gene Count | Fold Enrichment |
|------------------------------------------------------|-----------------------------|------------|-----------------|
| cfa00640:Propanoate metabolism                       | <b>2.45</b>                 | 10         | 3.05            |
| cfa00510:N-Glycan biosynthesis                       | <b>1.41</b>                 | 10         | 2.13            |
| cfa04340:Hedgehog signaling pathway                  | <b>1.39</b>                 | 11         | 2.01            |
| cfa03060:Protein export                              | <b>1.32</b>                 | 4          | 4.58            |
| cfa00604:Glycosphingolipid biosynthesis              | 1.24                        | 5          | 3.27            |
| cfa04950:Maturity onset diabetes of the young        | 1.08                        | 6          | 2.50            |
| cfa04916:Melanogenesis                               | 1.02                        | 16         | 1.53            |
| cfa04720:Long-term potentiation                      | 1.00                        | 12         | 1.66            |
| cfa00250:Alanine, aspartate and glutamate metabolism | 1.00                        | 7          | 2.14            |
| cfa00830:Retinol metabolism                          | 0.95                        | 8          | 1.93            |

### Both

| Gene Classification Group                            | Score (-log <sub>10</sub> ) | Gene Count | Fold Enrichment |
|------------------------------------------------------|-----------------------------|------------|-----------------|
| cfa05221:Acute myeloid leukemia                      | <b>2.16</b>                 | 10         | 2.87            |
| cfa00561:Glycerolipid metabolism                     | <b>1.88</b>                 | 8          | 3.08            |
| cfa00330:Arginine and proline metabolism             | <b>1.82</b>                 | 9          | 2.73            |
| cfa03320:PPAR signaling pathway                      | 1.20                        | 9          | 2.09            |
| cfa04920:Adipocytokine signaling pathway             | 0.97                        | 8          | 1.97            |
| cfa04530:Tight junction                              | 0.95                        | 13         | 1.59            |
| cfa00350:Tyrosine metabolism                         | 0.93                        | 5          | 2.63            |
| cfa00051:Fructose and mannose metabolism             | 0.93                        | 5          | 2.63            |
| cfa00520:Amino sugar and nucleotide sugar metabolism | 0.91                        | 6          | 2.25            |
| cfa04810:Regulation of actin cytoskeleton            | 0.88                        | 18         | 1.41            |

## S5 Table. Functional Annotation Analysis for Bystander / H1N1+ Mammary Gland Comparison

### ii. Gene Ontology – Biological Process Annotations

#### Upregulated Genes; Day 3/4

##### H1N1+

| Gene Classification Group                                | Score<br>(-log <sub>10</sub> ) | Gene<br>Count | Fold Enrichment |
|----------------------------------------------------------|--------------------------------|---------------|-----------------|
| GO:0050790~regulation of catalytic activity              | 4.02                           | 10            | 4.69            |
| GO:0065009~regulation of molecular function              | 3.58                           | 10            | 4.15            |
| GO:0051336~regulation of hydrolase activity              | 2.43                           | 6             | 5.22            |
| GO:0043085~positive regulation of catalytic activity     | 2.25                           | 6             | 4.77            |
| GO:0044093~positive regulation of molecular function     | 2.01                           | 6             | 4.22            |
| GO:0012502~induction of programmed cell death            | 1.65                           | 4             | 6.09            |
| GO:0006917~induction of apoptosis                        | 1.65                           | 4             | 6.09            |
| GO:0048070~regulation of pigmentation during development | 1.60                           | 3             | 10.97           |
| GO:0048518~positive regulation of biological process     | 1.51                           | 11            | 2.01            |
| GO:0043933~macromolecular complex subunit organization   | 1.47                           | 4             | 5.22            |

##### Bystander

| Gene Classification Group                             | Score<br>(-log <sub>10</sub> ) | Gene<br>Count | Fold Enrichment |
|-------------------------------------------------------|--------------------------------|---------------|-----------------|
| GO:0065008~regulation of biological quality           | 1.94                           | 14            | 2.02            |
| GO:0065007~biological regulation                      | 1.62                           | 31            | 1.33            |
| GO:0043687~post-translational protein modification    | 1.40                           | 7             | 2.62            |
| GO:0043412~biopolymer modification                    | 1.29                           | 8             | 2.25            |
| GO:0006464~protein modification process               | 1.29                           | 8             | 2.25            |
| GO:0042311~vasodilation                               | 1.18                           | 3             | 6.74            |
| GO:0019725~cellular homeostasis                       | 1.18                           | 6             | 2.62            |
| GO:0000041~transition metal ion transport             | 1.08                           | 3             | 5.90            |
| GO:0044267~cellular protein metabolic process         | 1.02                           | 9             | 1.84            |
| GO:0015674~di-, tri-valent inorganic cation transport | 0.98                           | 3             | 5.24            |

##### Both

| Gene Classification Group                               | Score<br>(-log <sub>10</sub> ) | Gene<br>Count | Fold Enrichment |
|---------------------------------------------------------|--------------------------------|---------------|-----------------|
| GO:0044260~cellular macromolecule metabolic process     | 1.00                           | 8             | 1.86            |
| GO:0034641~cellular nitrogen compound metabolic process | 0.95                           | 6             | 2.18            |
| GO:0043170~macromolecule metabolic process              | 0.93                           | 9             | 1.67            |
| GO:0006807~nitrogen compound metabolic process          | 0.87                           | 6             | 2.07            |
| GO:0008380~RNA splicing                                 | 0.86                           | 2             | 13.10           |
| GO:0006520~cellular amino acid metabolic process        | 0.73                           | 2             | 9.36            |
| GO:0006396~RNA processing                               | 0.67                           | 2             | 8.19            |
| GO:0006397~mRNA processing                              | 0.67                           | 2             | 8.19            |
| GO:0016071~mRNA metabolic process                       | 0.67                           | 2             | 8.19            |
| GO:0010467~gene expression                              | 0.64                           | 4             | 2.30            |

# Upregulated Genes; Day 6/7

## H1N1+

| Gene Classification Group                            | Score (-log <sub>10</sub> ) | Gene Count | Fold Enrichment |
|------------------------------------------------------|-----------------------------|------------|-----------------|
| GO:0043085~positive regulation of catalytic activity | 3.35                        | 10         | 3.80            |
| GO:0050790~regulation of catalytic activity          | 3.20                        | 13         | 2.91            |
| GO:0009987~cellular process                          | 3.17                        | 61         | 1.33            |
| GO:0044093~positive regulation of molecular function | 2.90                        | 10         | 3.36            |
| GO:0048518~positive regulation of biological process | 2.72                        | 22         | 1.92            |
| GO:0065009~regulation of molecular function          | 2.68                        | 13         | 2.58            |
| GO:0048522~positive regulation of cellular process   | 2.52                        | 20         | 1.94            |
| GO:0007242~intracellular signaling cascade           | 2.34                        | 14         | 2.26            |
| GO:0006470~protein amino acid dephosphorylation      | 2.29                        | 4          | 8.73            |
| GO:0016311~dephosphorylation                         | 2.29                        | 4          | 8.73            |

## Bystander

| Gene Classification Group                               | Score (-log <sub>10</sub> ) | Gene Count | Fold Enrichment |
|---------------------------------------------------------|-----------------------------|------------|-----------------|
| GO:0042180~cellular ketone metabolic process            | 1.24                        | 4          | 4.28            |
| GO:0019752~carboxylic acid metabolic process            | 1.24                        | 4          | 4.28            |
| GO:0043436~oxoacid metabolic process                    | 1.24                        | 4          | 4.28            |
| GO:0006082~organic acid metabolic process               | 1.24                        | 4          | 4.28            |
| GO:0016043~cellular component organization              | 1.11                        | 7          | 2.21            |
| GO:0044271~nitrogen compound biosynthetic process       | 1.09                        | 4          | 3.74            |
| GO:0034641~cellular nitrogen compound metabolic process | 1.08                        | 8          | 2.00            |
| GO:0006807~nitrogen compound metabolic process          | 0.98                        | 8          | 1.89            |
| GO:0043933~macromolecular complex subunit organization  | 0.92                        | 3          | 4.81            |
| GO:0019217~regulation of fatty acid metabolic process   | 0.91                        | 2          | 14.97           |

## Both

| Gene Classification Group                               | Score (-log <sub>10</sub> ) | Gene Count | Fold Enrichment |
|---------------------------------------------------------|-----------------------------|------------|-----------------|
| GO:0044238~primary metabolic process                    | 2.44                        | 32         | 1.53            |
| GO:0006807~nitrogen compound metabolic process          | 2.03                        | 16         | 1.95            |
| GO:0044237~cellular metabolic process                   | 1.89                        | 28         | 1.49            |
| GO:0034641~cellular nitrogen compound metabolic process | 1.85                        | 15         | 1.93            |
| GO:0044260~cellular macromolecule metabolic process     | 1.72                        | 20         | 1.64            |
| GO:0006826~iron ion transport                           | 1.69                        | 3          | 11.56           |
| GO:0000041~transition metal ion transport               | 1.61                        | 4          | 5.78            |
| GO:0008152~metabolic process                            | 1.58                        | 36         | 1.31            |
| GO:0015674~di-, tri-valent inorganic cation transport   | 1.47                        | 4          | 5.14            |
| GO:0010467~gene expression                              | 1.35                        | 10         | 2.03            |

## Downregulated Genes; Day 3/4

### H1N1+

| Gene Classification Group                                        | Score<br>(-log <sub>10</sub> ) | Gene<br>Count | Fold Enrichment |
|------------------------------------------------------------------|--------------------------------|---------------|-----------------|
| GO:0055114~oxidation reduction                                   | 1.96                           | 12            | 2.25            |
| GO:0002376~immune system process                                 | 1.80                           | 16            | 1.85            |
| GO:0006955~immune response                                       | 1.20                           | 12            | 1.75            |
| GO:0006357~regulation of transcription from RNA polymerase (...) | 1.03                           | 5             | 2.77            |
| GO:0022900~electron transport chain                              | 0.99                           | 4             | 3.41            |
| GO:0009887~organ morphogenesis                                   | 0.97                           | 6             | 2.29            |
| GO:0007423~sensory organ development                             | 0.97                           | 5             | 2.64            |
| GO:0051924~regulation of calcium ion transport                   | 0.91                           | 3             | 4.74            |
| GO:0045449~regulation of transcription                           | 0.81                           | 9             | 1.66            |
| GO:0010959~regulation of metal ion transport                     | 0.81                           | 3             | 4.15            |

### Bystander

| Gene Classification Group                                       | Score<br>(-log <sub>10</sub> ) | Gene<br>Count | Fold Enrichment |
|-----------------------------------------------------------------|--------------------------------|---------------|-----------------|
| GO:0032501~multicellular organismal process                     | 1.72                           | 20            | 1.57            |
| GO:0006518~peptide metabolic process                            | 1.62                           | 3             | 11.23           |
| GO:0006928~cell motion                                          | 1.50                           | 5             | 3.90            |
| GO:0009888~tissue development                                   | 1.33                           | 6             | 2.88            |
| GO:0048871~multicellular organismal homeostasis                 | 1.22                           | 3             | 7.02            |
| GO:0007275~multicellular organismal development                 | 1.20                           | 13            | 1.66            |
| GO:0016043~cellular component organization                      | 1.17                           | 8             | 2.11            |
| GO:0048856~anatomical structure development                     | 1.12                           | 12            | 1.66            |
| GO:0007169~transmembrane receptor protein tyrosine kinase (...) | 1.12                           | 3             | 6.24            |
| GO:0035239~tube morphogenesis                                   | 1.04                           | 3             | 5.61            |

### Both

| Gene Classification Group                                         | Score<br>(-log <sub>10</sub> ) | Gene<br>Count | Fold Enrichment |
|-------------------------------------------------------------------|--------------------------------|---------------|-----------------|
| GO:0007166~cell surface receptor linked signal transduction       | 0.53                           | 4             | 1.93            |
| GO:0055114~oxidation reduction                                    | 0.24                           | 2             | 2.22            |
| GO:0019219~regulation of nucleobase, nucleoside, nucleotide (...) | 0.18                           | 2             | 1.82            |
| GO:0051171~regulation of nitrogen compound metabolic process      | 0.18                           | 2             | 1.79            |
| GO:0031326~regulation of cellular biosynthetic process            | 0.15                           | 2             | 1.60            |
| GO:0030154~cell differentiation                                   | 0.15                           | 2             | 1.58            |
| GO:0008152~metabolic process                                      | 0.15                           | 5             | 1.03            |
| GO:0009889~regulation of biosynthetic process                     | 0.15                           | 2             | 1.56            |
| GO:0048869~cellular developmental process                         | 0.14                           | 2             | 1.52            |
| GO:0043170~macromolecule metabolic process                        | 0.13                           | 3             | 1.12            |

# Downregulated Genes; Day 6/7

## H1N1+

| Gene Classification Group                                   | Score (-log <sub>10</sub> ) | Gene Count | Fold Enrichment |
|-------------------------------------------------------------|-----------------------------|------------|-----------------|
| GO:0001568~blood vessel development                         | 1.31                        | 6          | 2.85            |
| GO:0032501~multicellular organismal process                 | 1.27                        | 28         | 1.34            |
| GO:0001944~vasculature development                          | 1.25                        | 6          | 2.73            |
| GO:0032844~regulation of homeostatic process                | 1.21                        | 3          | 6.83            |
| GO:0048731~system development                               | 1.16                        | 17         | 1.51            |
| GO:0042325~regulation of phosphorylation                    | 1.13                        | 5          | 3.00            |
| GO:0002696~positive regulation of leukocyte activation      | 1.11                        | 4          | 3.80            |
| GO:0031399~regulation of protein modification process       | 1.11                        | 4          | 3.80            |
| GO:0001932~regulation of protein amino acid phosphorylation | 1.11                        | 4          | 3.80            |
| GO:0050867~positive regulation of cell activation           | 1.11                        | 4          | 3.80            |

## Bystander

| Gene Classification Group                          | Score (-log <sub>10</sub> ) | Gene Count | Fold Enrichment |
|----------------------------------------------------|-----------------------------|------------|-----------------|
| GO:0043010~camera-type eye development             | 1.22                        | 5          | 3.15            |
| GO:0046365~monosaccharide catabolic process        | 1.13                        | 3          | 6.14            |
| GO:0006007~glucose catabolic process               | 1.13                        | 3          | 6.14            |
| GO:0006096~glycolysis                              | 1.13                        | 3          | 6.14            |
| GO:0019320~hexose catabolic process                | 1.13                        | 3          | 6.14            |
| GO:0000902~cell morphogenesis                      | 1.11                        | 5          | 2.92            |
| GO:0033036~macromolecule localization              | 1.04                        | 10         | 1.78            |
| GO:0007423~sensory organ development               | 1.01                        | 6          | 2.34            |
| GO:0044275~cellular carbohydrate catabolic process | 0.95                        | 3          | 4.91            |
| GO:0016052~carbohydrate catabolic process          | 0.95                        | 3          | 4.91            |

## Both

| Gene Classification Group                                   | Score (-log <sub>10</sub> ) | Gene Count | Fold Enrichment |
|-------------------------------------------------------------|-----------------------------|------------|-----------------|
| GO:0046942~carboxylic acid transport                        | 1.70                        | 4          | 6.24            |
| GO:0015849~organic acid transport                           | 1.70                        | 4          | 6.24            |
| GO:0008643~carbohydrate transport                           | 1.56                        | 4          | 5.61            |
| GO:0015837~amine transport                                  | 1.09                        | 3          | 6.02            |
| GO:0006865~amino acid transport                             | 1.09                        | 3          | 6.02            |
| GO:0006810~transport                                        | 0.83                        | 17         | 1.35            |
| GO:0051234~establishment of localization                    | 0.80                        | 17         | 1.33            |
| GO:0007167~enzyme linked receptor protein signaling pathway | 0.64                        | 3          | 3.24            |
| GO:0010556~regulation of macromolecule biosynthetic process | 0.64                        | 8          | 1.56            |
| GO:0045449~regulation of transcription                      | 0.63                        | 7          | 1.64            |
