# Supplementary material for: Influenza Transmission in the Mother-Infant Dyad Leads to Severe Disease, Mammary Gland Infection, and Pathogenesis by Regulating Host Responses
Source: PubMed Central journal article supplement (PMC4598190; doi:10.1371/journal.ppat.1005173), 2015-10-08

### A Infant Intranasal Inoculation

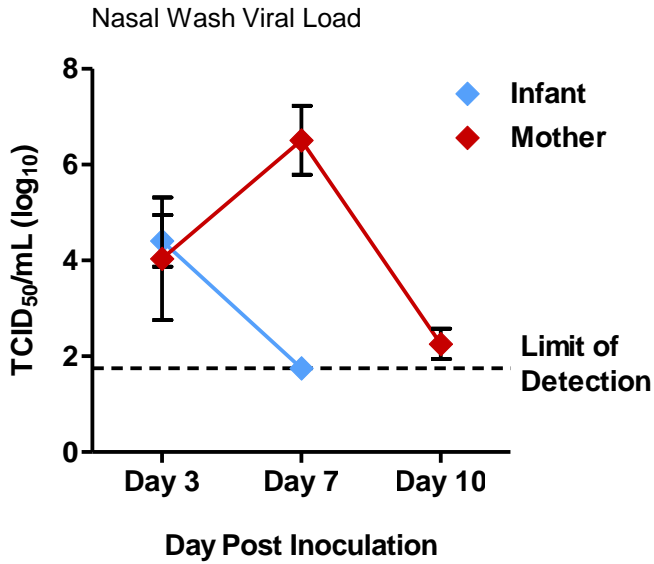

### B Mother Intranasal Inoculation

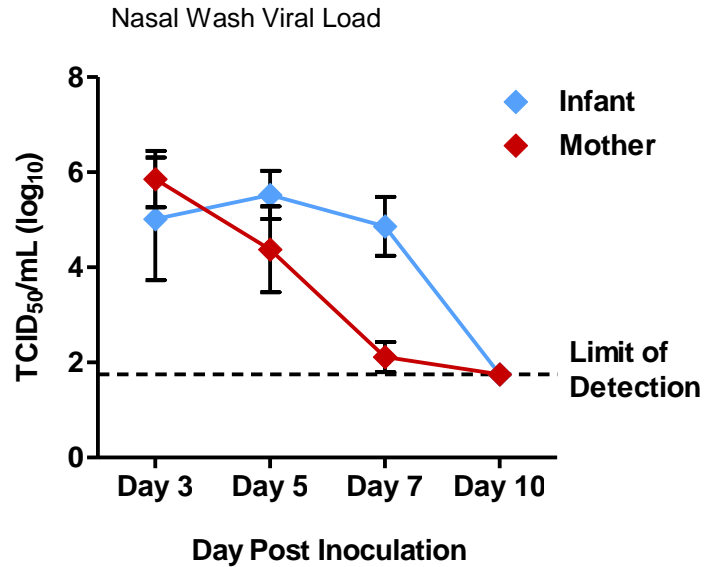

### C Adult Intranasal Infection and Transmission

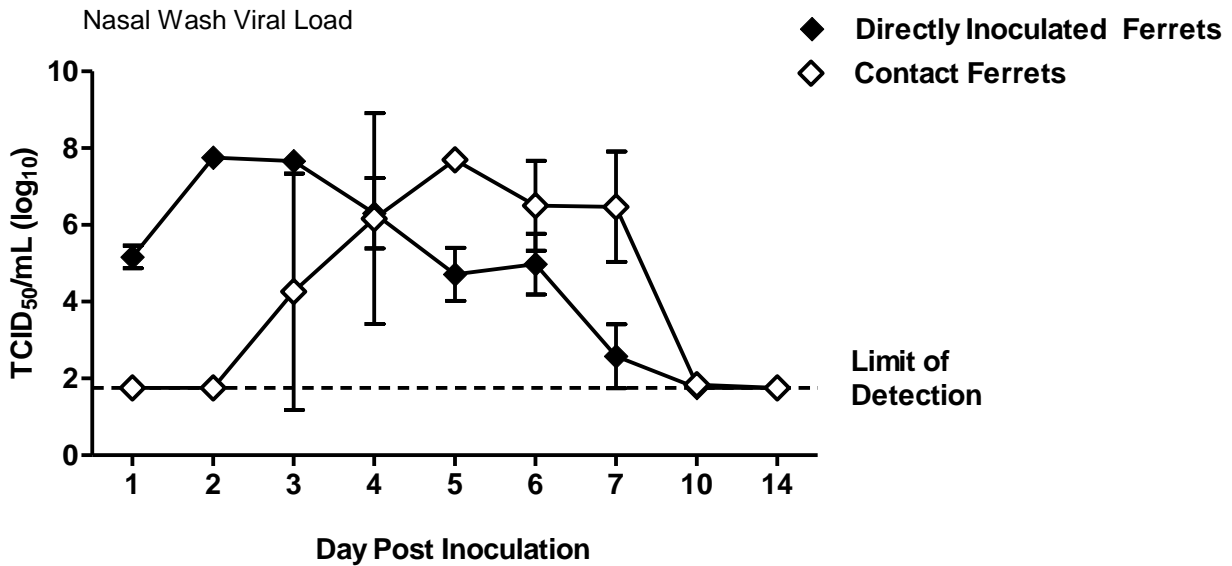

Supplement: ppat.1005173.s006.pdf [file ppat.1005173.s006.pdf]
