# Supplementary material for: Influenza Transmission in the Mother-Infant Dyad Leads to Severe Disease, Mammary Gland Infection, and Pathogenesis by Regulating Host Responses
Source: PubMed Central journal article supplement (PMC4598190; doi:10.1371/journal.ppat.1005173), 2015-10-08
Supplement: ppat.1005173.s007.pdf [file ppat.1005173.s007.pdf]

# Jak-STAT Signaling Pathway; cfa04630

## Mammary Gland (MG)

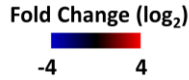

Mock D3/4 D6/7

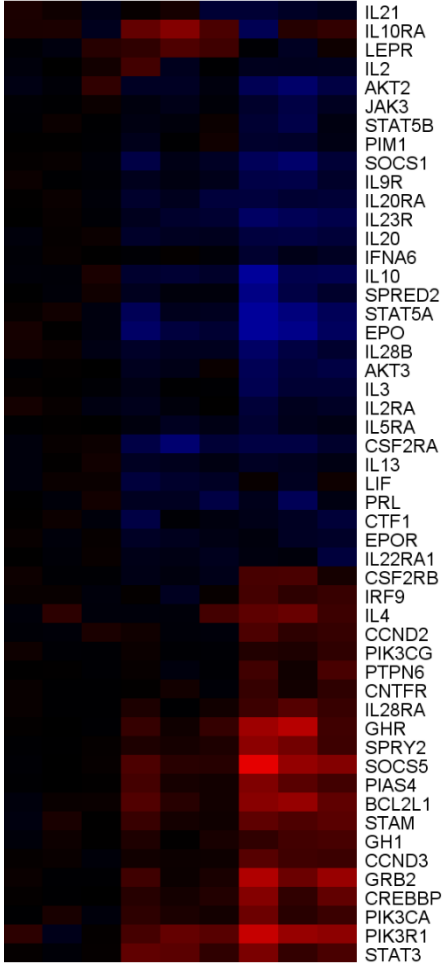

# Jak/STAT Signaling

## Mammary Gland (MG) D6/7

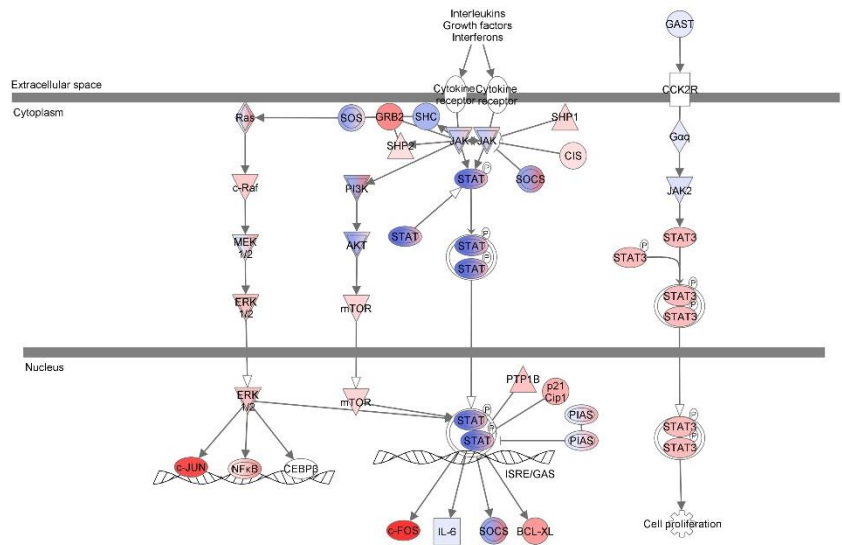

# TGF- $\beta$ Signaling Pathway; cfa04350

## Mammary Gland (MG)

Fold Change ( $\log_2$ )

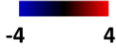

Mock D3/4 D6/7

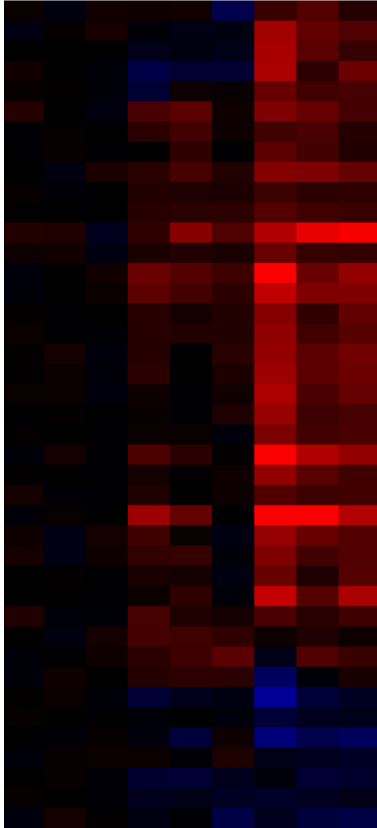

TFDP1  
ACVRL1  
ID3  
FST  
ROCK1  
SMAD3  
SMURF1  
SMAD7  
E2F5  
RPS6KB1  
ACVR1B  
ACVR1C  
SMAD4  
TGFB2  
SMURF2  
CREBBP  
PPP2CA  
CUL1  
SMAD2  
RHOA  
RBX1  
INHBA  
DCN  
PPP2CB  
ACVR2A  
THBS4  
COMP  
SMAD6  
MAPK1  
BMP2  
PPP2R1A  
TNF  
BMP7  
THBS1  
RBL2  
BMP1B  
INHBC  
ACVR2B  
SKP1  
GDF5  
ACVR1

# TGF- $\beta$ Signaling

## Mammary Gland (MG) D6/7

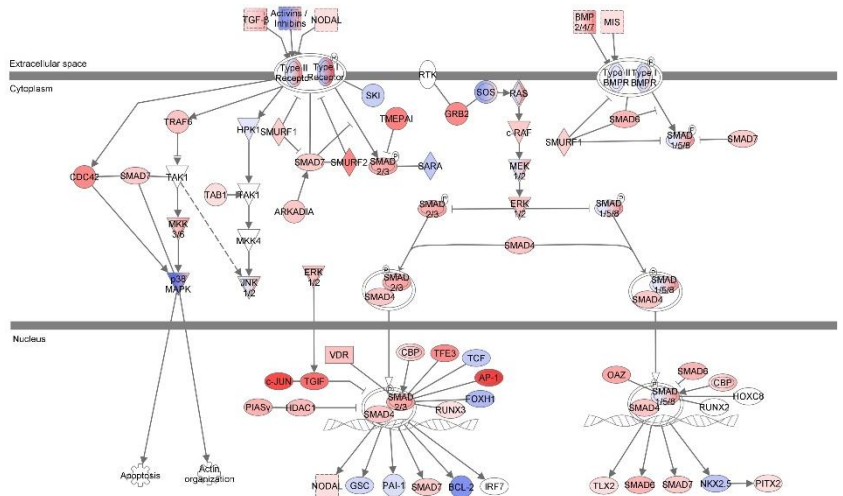

# Wnt Signaling Pathway; cfa04310

## Mammary Gland (MG)

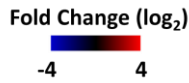

Mock D3/4 D6/7

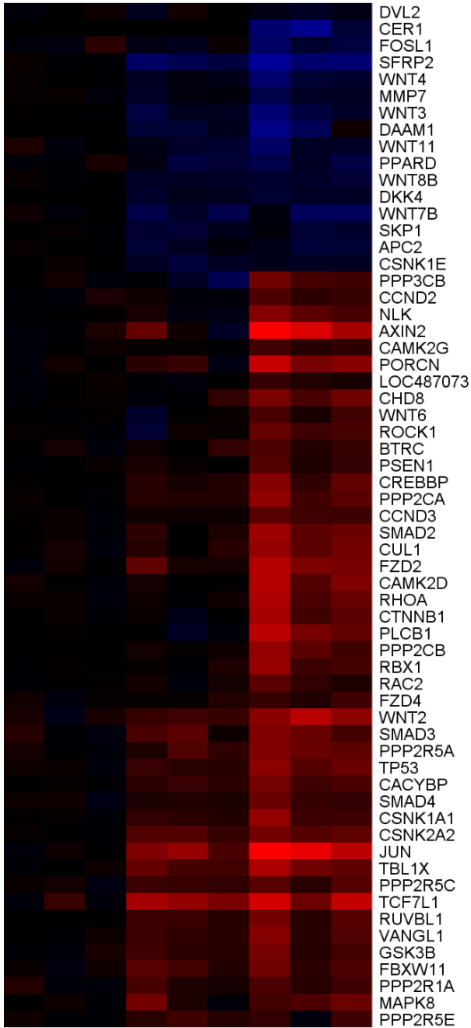

## Wnt/ $\beta$ -Catenin Signaling

### Mammary Gland (MG) D6/7

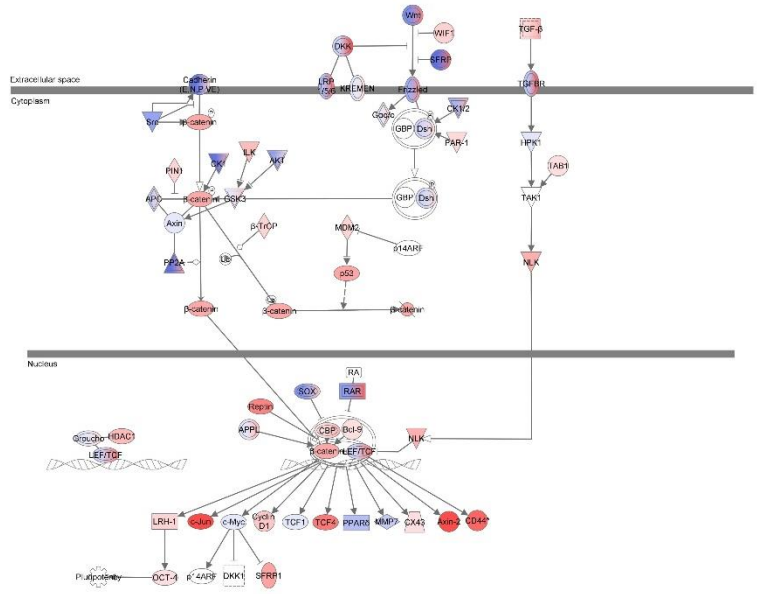

**p53 Signaling Pathway; cfa04115**  
**Mammary Gland (MG)**

**p53 Signaling**  
**Mammary Gland (MG) D6/7**

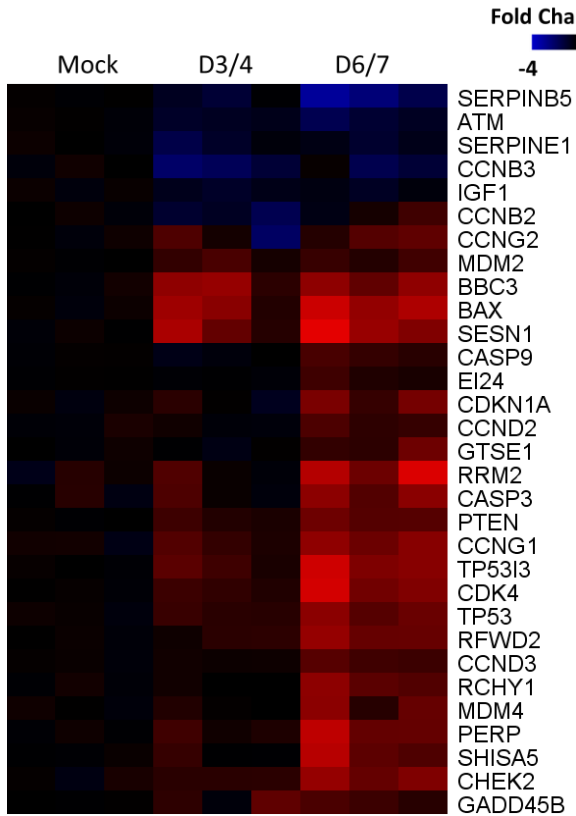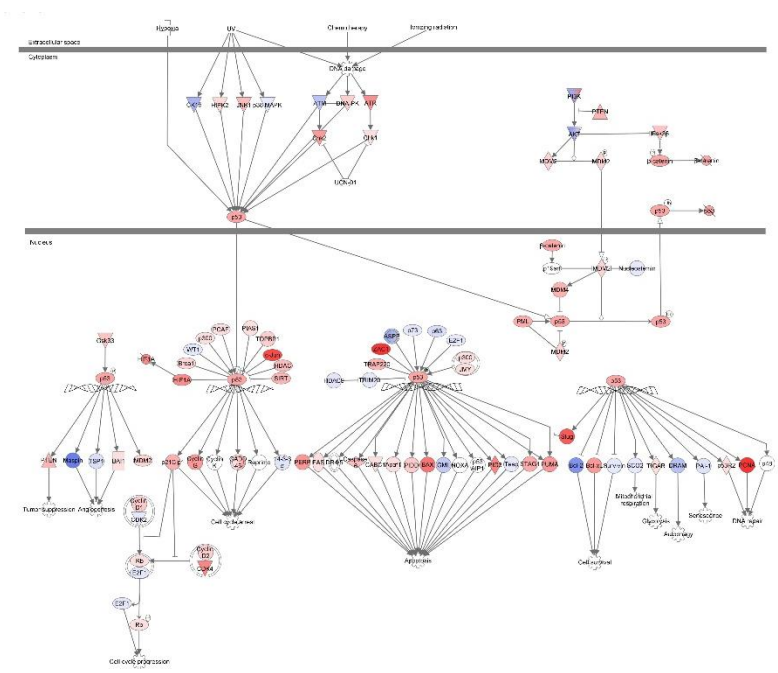

# Neurotrophin Signaling Pathway; cfa04722

## Mammary Gland (MG)

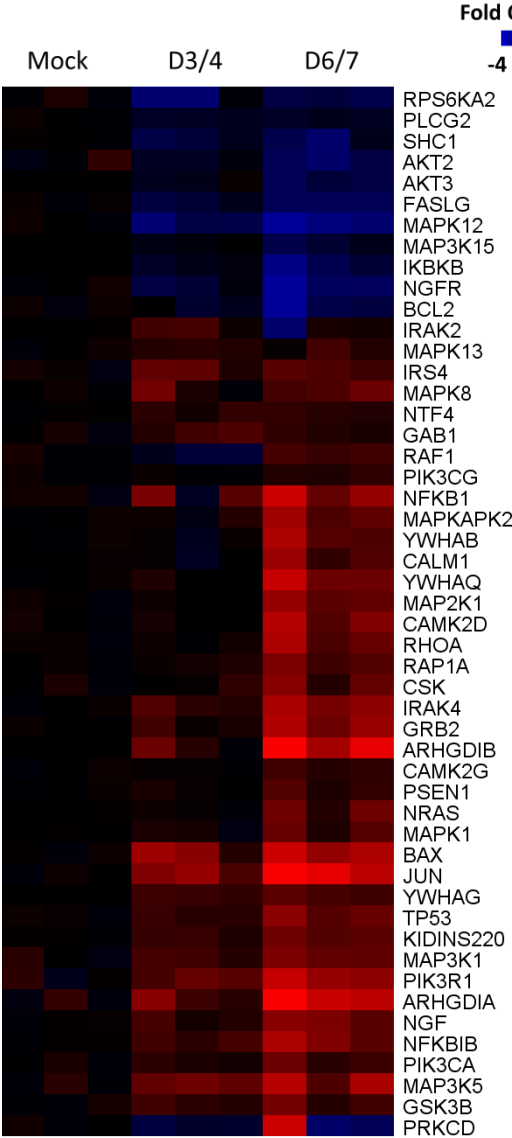

# Neurotrophin/RTK Signaling

## Mammary Gland (MG) D6/7

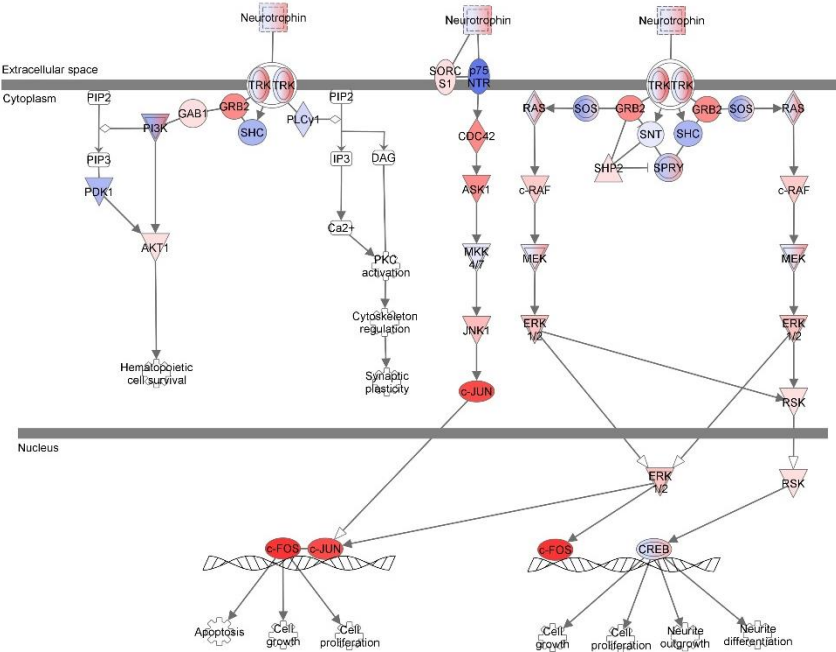

# PPAR Signaling Pathway; cfa03320

## Mammary Gland (MG)

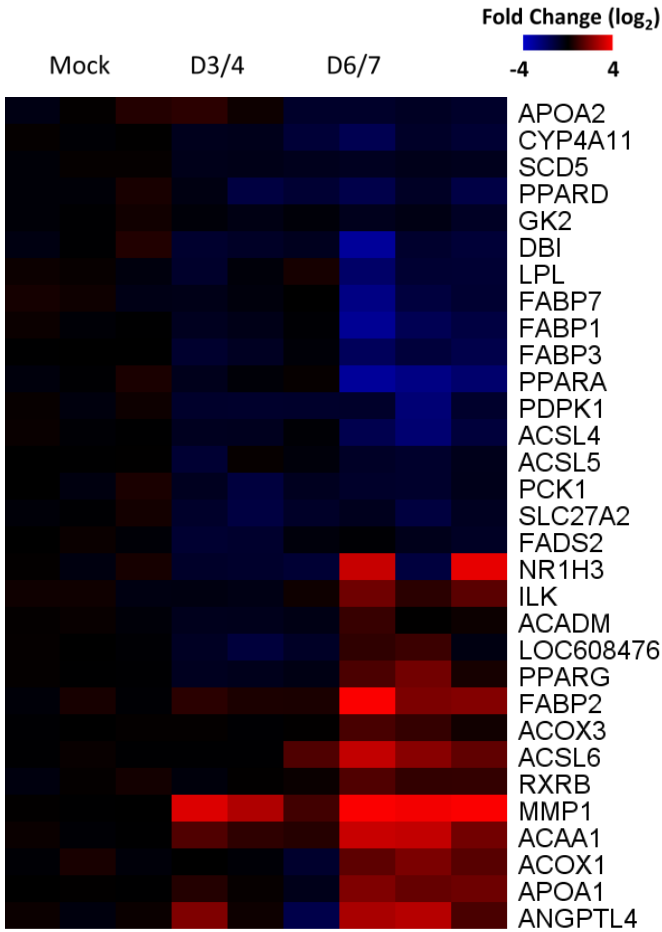

# PPAR Signaling

## Mammary Gland (MG) D6/7

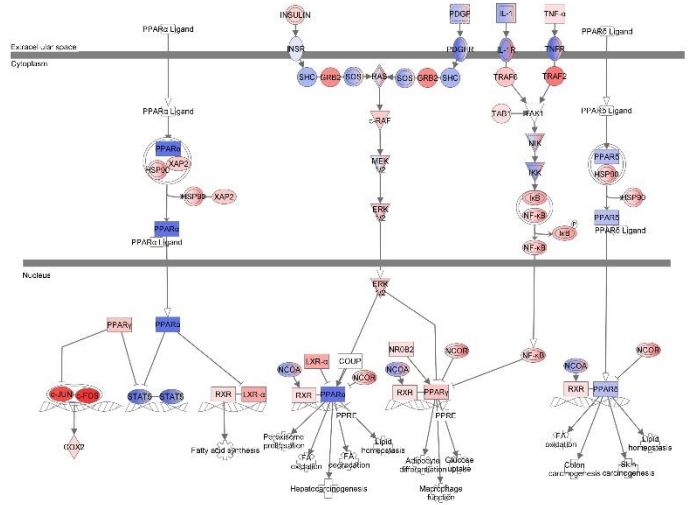

# Toll-Like Receptor Signaling Pathway; cfa04620

## Mammary Gland (MG)

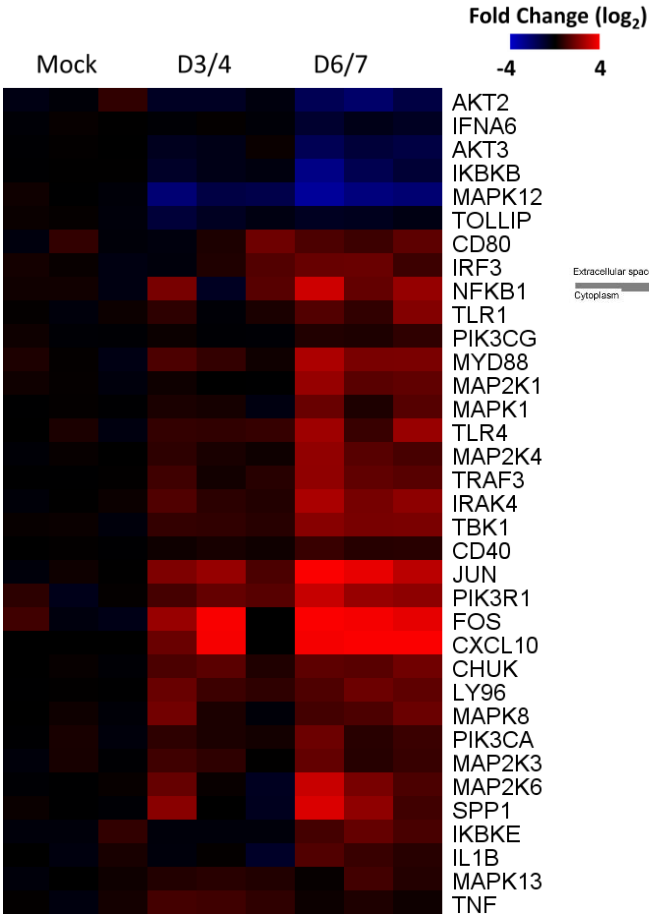

# Toll-Like Receptor Signaling

## Mammary Gland (MG) D6/7

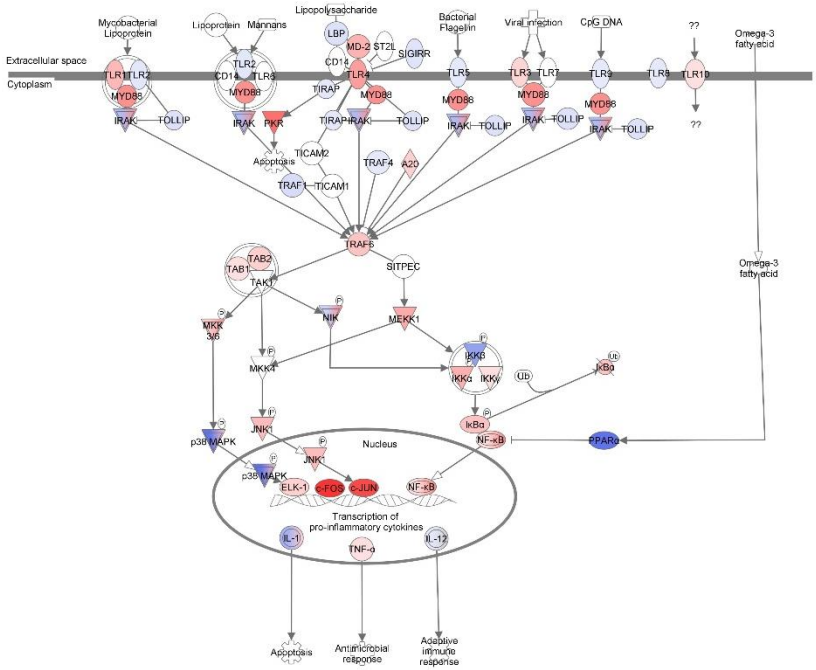

# Pathways in Cancer; cfa05200 Mammary Gland (MG)

Fold Change (log<sub>2</sub>)

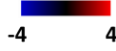

Mock      D3/4      D6/7

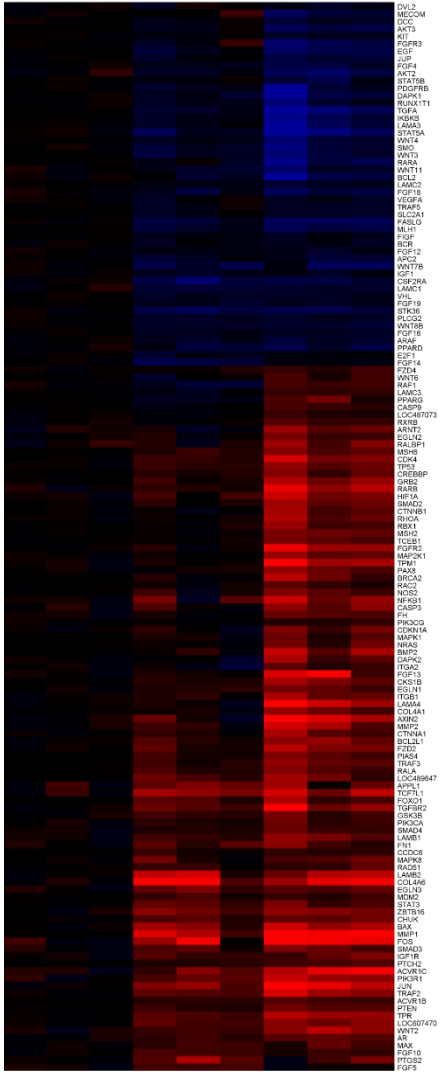

## Molecular Mechanisms of Cancer Mammary Gland (MG) D6/7

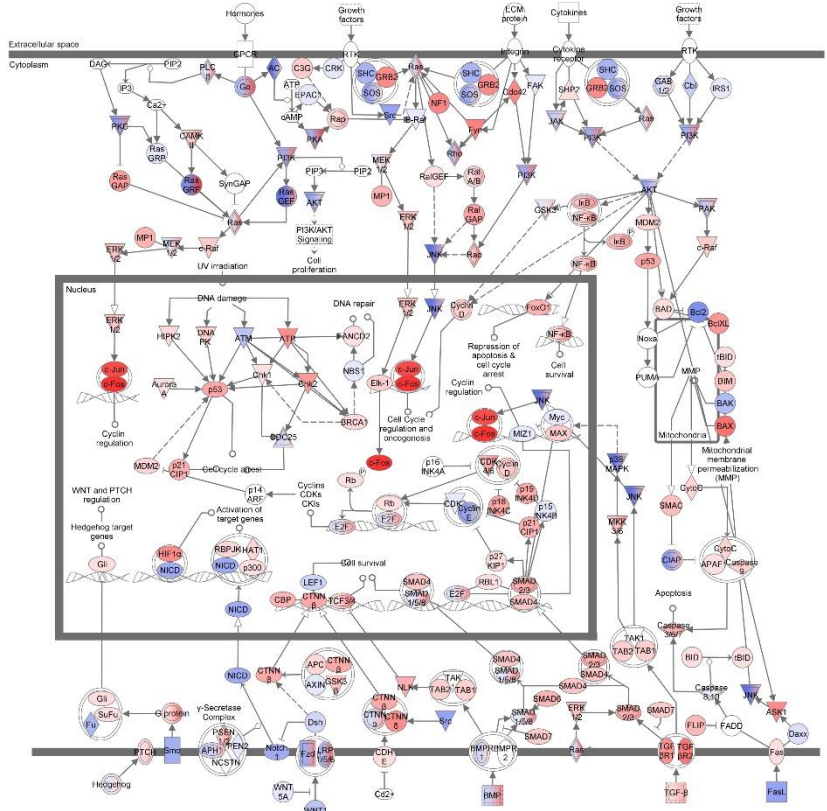



# Cell Cycle; cfa04110

## Mammary Gland (MG)

Mock D3/4 D6/7

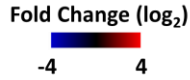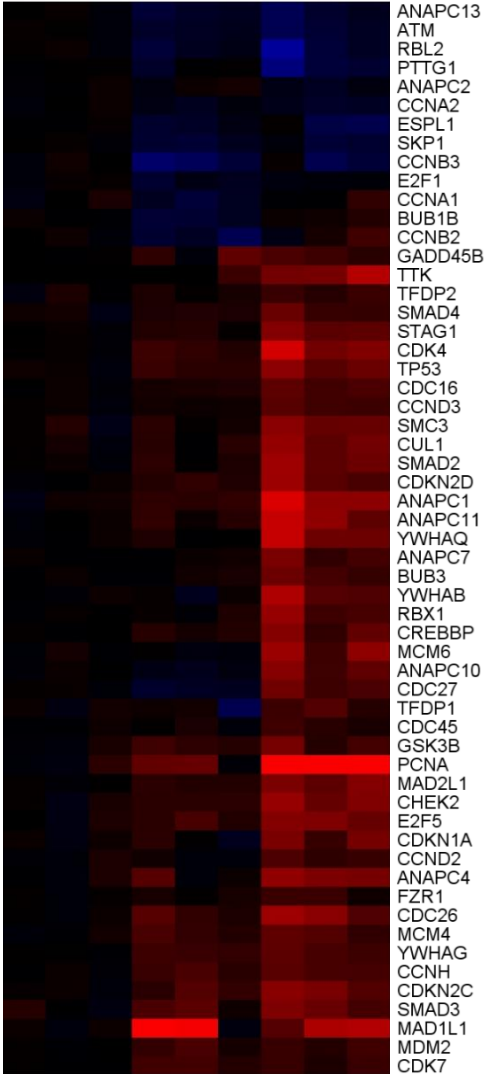

# Cyclins and Cell Cycle Regulation

## Mammary Gland (MG) D6/7

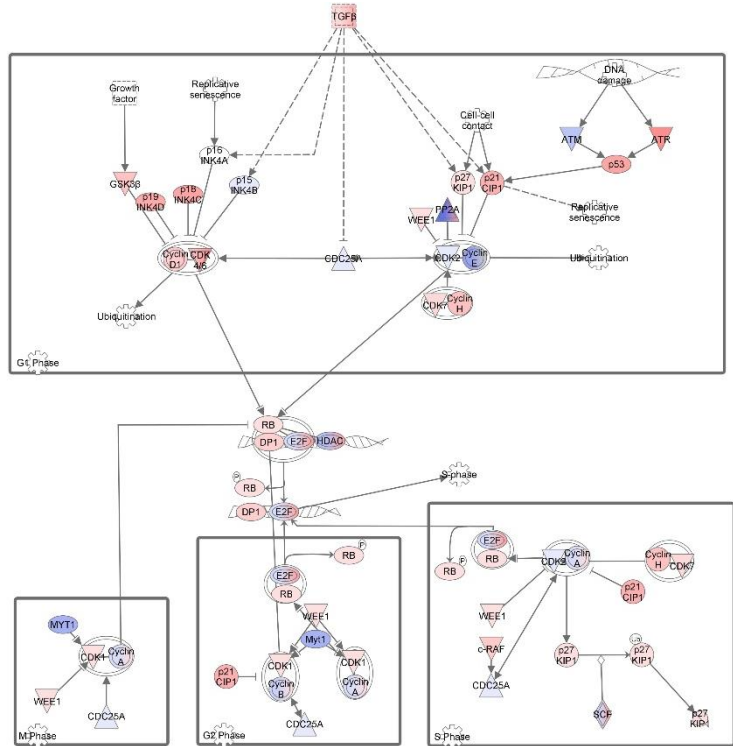

## Focal Adhesion; cfa04510

### Mammary Gland (MG)

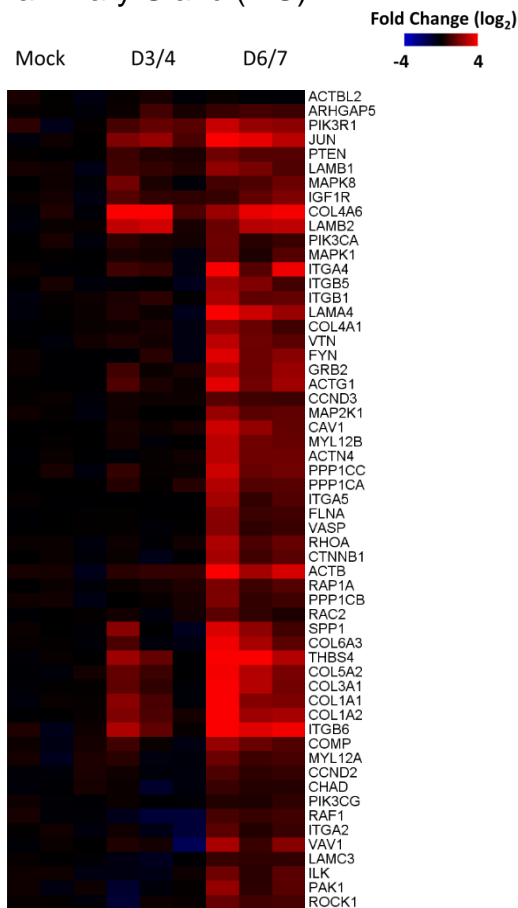

## Epithelial Adherens Junction Signaling

### Mammary Gland (MG) D6/7

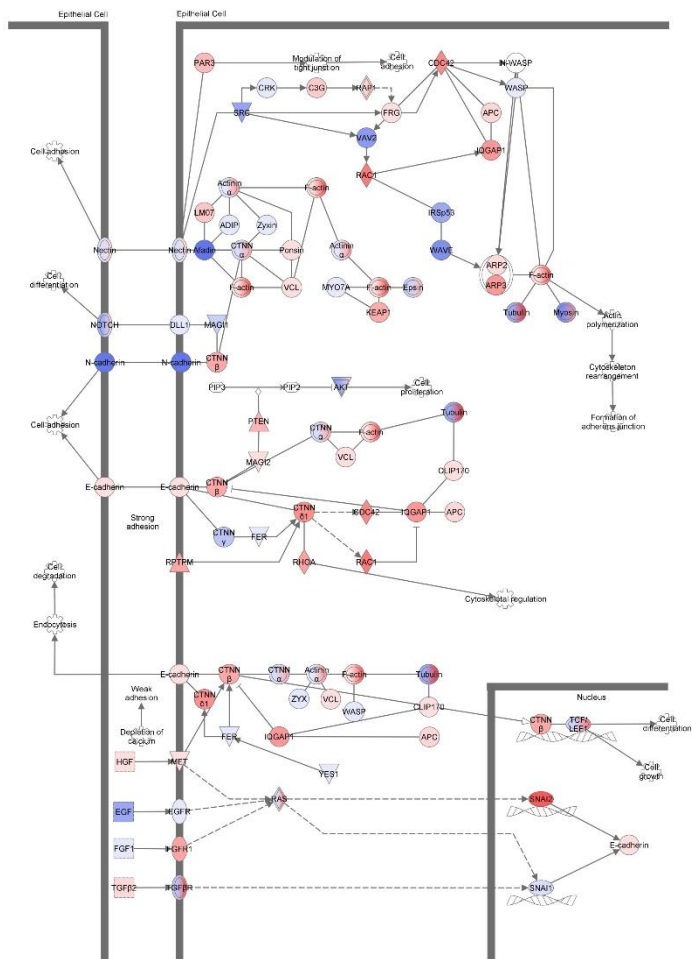

## Adherens Junction; cfa04520

### Mammary Gland (MG)

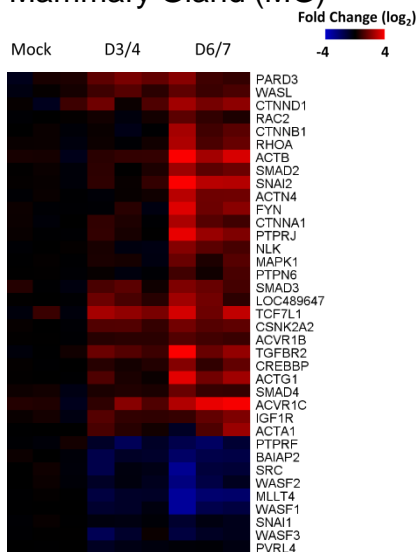

## Network Shapes

-  Cytokine
-  Growth Factor
-  Chemical / Drug/ Toxicant
-  Enzyme
-  G-protein Coupled Receptor
-  Ion Channel
-  Kinase
-  Ligand-dependent Nuclear Receptor
-  Peptidase
-  Phosphatase
-  Transcription Regulator
-  Translation Regulator
-  Transmembrane Receptor
-  Transporter
-  microRNA
-  Complex / Group
-  Other

\*For dataset files that contain only identifiers (i.e. no expression values), the color gray identifies the Focus Genes from that dataset.

- Red** User input molecule that is upregulated (i.e. has a positive (+) expression value) and whose expression value meets the user defined cutoff.
- Green** User input molecule that is downregulated (i.e. has a negative (-) expression value) and whose expression value meets the user defined cutoff.
- Gray** User input molecule. Neither up nor down-regulated or does not meet the user-defined cutoff.
- White** Molecule that is not user specified, but incorporated into the network through relationships with other molecules.
- [Blue]** For canonical pathways, molecules that are members of the network being examined are outlined in blue.
