# Supplementary material for: Influenza Transmission in the Mother-Infant Dyad Leads to Severe Disease, Mammary Gland Infection, and Pathogenesis by Regulating Host Responses
Source: PubMed Central journal article supplement (PMC4598190; doi:10.1371/journal.ppat.1005173), 2015-10-08

## Milk Production Associated Genes

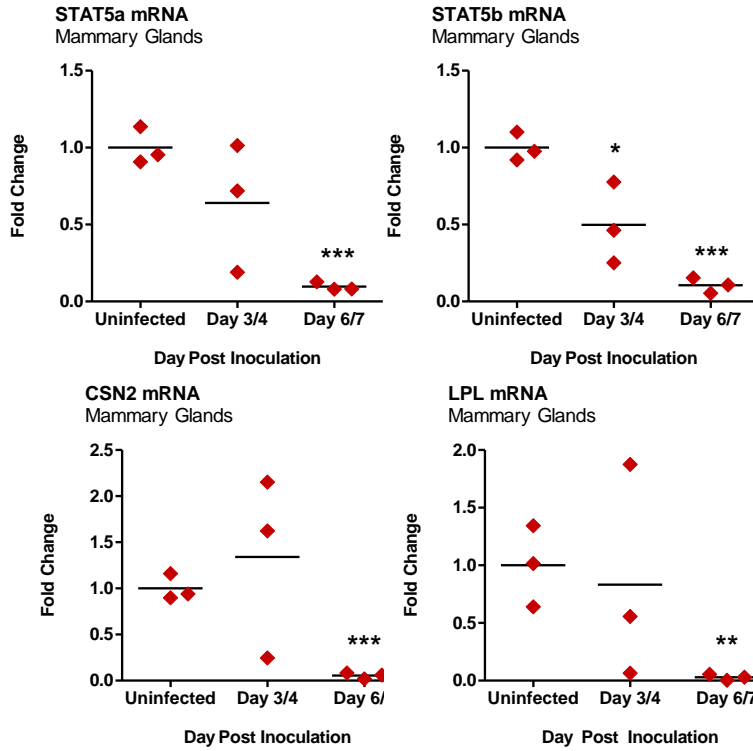

## Cancer Associated Genes

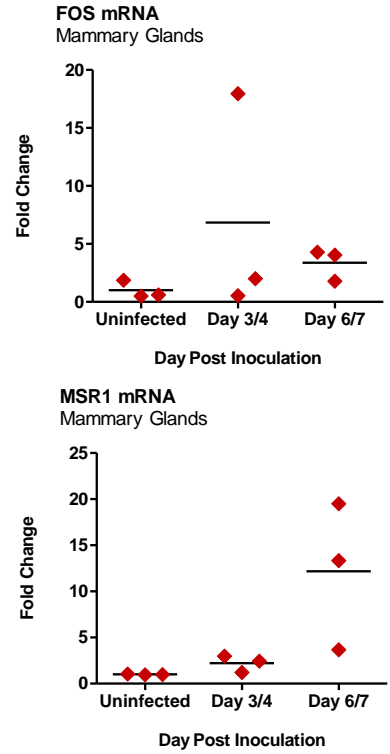

## Immune Response Genes

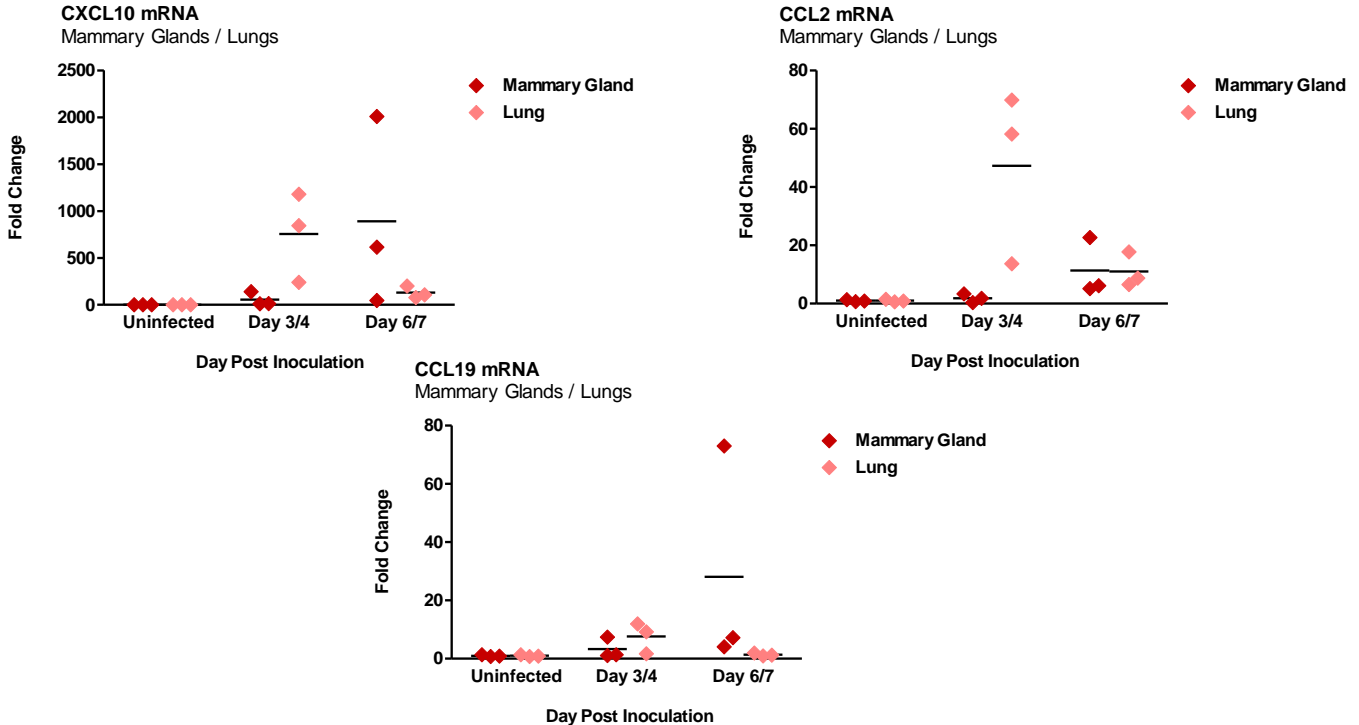

Supplement: ppat.1005173.s008.pdf [file ppat.1005173.s008.pdf]
