# Supplementary material for: Influenza Transmission in the Mother-Infant Dyad Leads to Severe Disease, Mammary Gland Infection, and Pathogenesis by Regulating Host Responses
Source: PubMed Central journal article supplement (PMC4598190; doi:10.1371/journal.ppat.1005173), 2015-10-08

# A Bystander Mammary Gland Analysis

## i Global Analysis

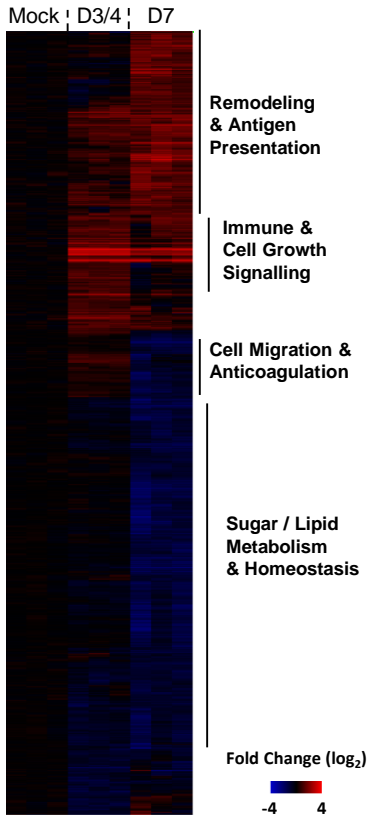

## ii Signaling Pathway Analysis

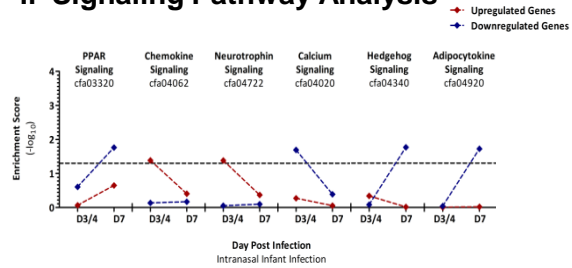

## iii Immune Responses

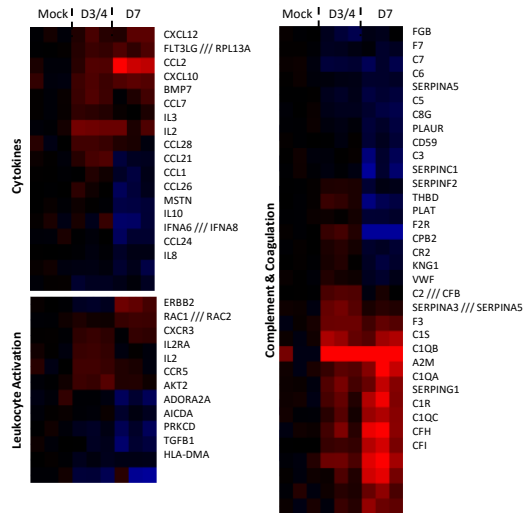

# B Comparative Mammary Gland Analysis

## i Upregulated Genes

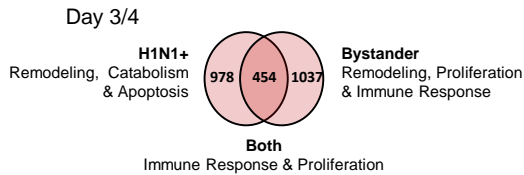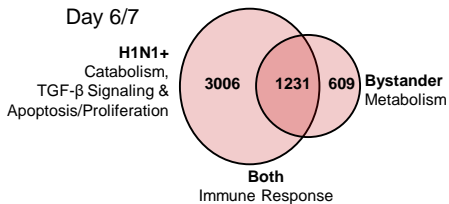

## ii Downregulated Genes

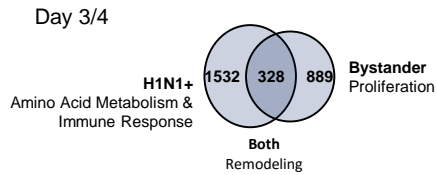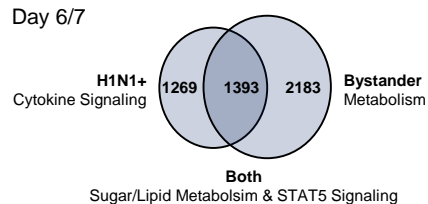

Supplement: ppat.1005173.s009.pdf [file ppat.1005173.s009.pdf]
