# Supplementary material for: Influenza Transmission in the Mother-Infant Dyad Leads to Severe Disease, Mammary Gland Infection, and Pathogenesis by Regulating Host Responses
Source: PubMed Central journal article supplement (PMC4598190; doi:10.1371/journal.ppat.1005173), 2015-10-08
Supplement: ppat.1005173.s010.pdf [file ppat.1005173.s010.pdf]

**+ 2009 H1N1**

**Vehicle**

**D0**

**D2**

**D4**

**D0**

**D2**

**D4**

**D7**

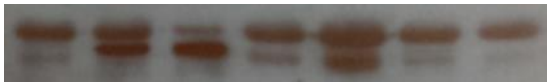

← **Beta-Casein**
